# Supplementary material for: Development and Validation of an Interpretable Artificial Intelligence Model to Predict 10-Year Prostate Cancer Mortality
Source: MDPI journal article supplement (doi:10.3390/cancers13123064), 2021-06-19
Supplement: s1 [file s1]

# TRIPOD Checklist: Prediction Model Validation

| Section/Topic                        | Item | Checklist Item                                                                                                                                                                                        | Page |
|--------------------------------------|------|-------------------------------------------------------------------------------------------------------------------------------------------------------------------------------------------------------|------|
| <b>Title and abstract</b>            |      |                                                                                                                                                                                                       |      |
| Title                                | 1    | Identify the study as developing and/or validating a multivariable prediction model, the target population, and the outcome to be predicted.                                                          | 1    |
| Abstract                             | 2    | Provide a summary of objectives, study design, setting, participants, sample size, predictors, outcome, statistical analysis, results, and conclusions.                                               | 1    |
| <b>Introduction</b>                  |      |                                                                                                                                                                                                       |      |
| Background and objectives            | 3a   | Explain the medical context (including whether diagnostic or prognostic) and rationale for developing or validating the multivariable prediction model, including references to existing models.      | 1    |
|                                      | 3b   | Specify the objectives, including whether the study describes the development or validation of the model or both.                                                                                     | 1-2  |
| <b>Methods</b>                       |      |                                                                                                                                                                                                       |      |
| Source of data                       | 4a   | Describe the study design or source of data (e.g., randomized trial, cohort, or registry data), separately for the development and validation data sets, if applicable.                               | 7    |
|                                      | 4b   | Specify the key study dates, including start of accrual; end of accrual; and, if applicable, end of follow-up.                                                                                        | 7    |
| Participants                         | 5a   | Specify key elements of the study setting (e.g., primary care, secondary care, general population) including number and location of centres.                                                          | 7    |
|                                      | 5b   | Describe eligibility criteria for participants.                                                                                                                                                       | 7    |
|                                      | 5c   | Give details of treatments received, if relevant.                                                                                                                                                     | 7    |
| Outcome                              | 6a   | Clearly define the outcome that is predicted by the prediction model, including how and when assessed.                                                                                                | 7    |
|                                      | 6b   | Report any actions to blind assessment of the outcome to be predicted.                                                                                                                                | NA   |
| Predictors                           | 7a   | Clearly define all predictors used in developing or validating the multivariable prediction model, including how and when they were measured.                                                         | 7    |
|                                      | 7b   | Report any actions to blind assessment of predictors for the outcome and other predictors.                                                                                                            | NA   |
| Sample size                          | 8    | Explain how the study size was arrived at.                                                                                                                                                            | 7    |
| Missing data                         | 9    | Describe how missing data were handled (e.g., complete-case analysis, single imputation, multiple imputation) with details of any imputation method.                                                  | 8    |
| Statistical analysis methods         | 10c  | For validation, describe how the predictions were calculated.                                                                                                                                         | 7    |
|                                      | 10d  | Specify all measures used to assess model performance and, if relevant, to compare multiple models.                                                                                                   | 7    |
|                                      | 10e  | Describe any model updating (e.g., recalibration) arising from the validation, if done.                                                                                                               | N/A  |
| Risk groups                          | 11   | Provide details on how risk groups were created, if done.                                                                                                                                             | N/A  |
| Development vs. validation           | 12   | For validation, identify any differences from the development data in setting, eligibility criteria, outcome, and predictors.                                                                         | N/A  |
| <b>Results</b>                       |      |                                                                                                                                                                                                       |      |
| Participants                         | 13a  | Describe the flow of participants through the study, including the number of participants with and without the outcome and, if applicable, a summary of the follow-up time. A diagram may be helpful. | 2    |
|                                      | 13b  | Describe the characteristics of the participants (basic demographics, clinical features, available predictors), including the number of participants with missing data for predictors and outcome.    | T1   |
|                                      | 13c  | For validation, show a comparison with the development data of the distribution of important variables (demographics, predictors and outcome).                                                        | F1   |
| Model performance                    | 16   | Report performance measures (with CIs) for the prediction model.                                                                                                                                      | T2   |
| Model-updating                       | 17   | If done, report the results from any model updating (i.e., model specification, model performance).                                                                                                   | NA   |
| <b>Discussion</b>                    |      |                                                                                                                                                                                                       |      |
| Limitations                          | 18   | Discuss any limitations of the study (such as nonrepresentative sample, few events per predictor, missing data).                                                                                      | 6    |
| Interpretation                       | 19a  | For validation, discuss the results with reference to performance in the development data, and any other validation data.                                                                             | 6    |
|                                      | 19b  | Give an overall interpretation of the results, considering objectives, limitations, results from similar studies, and other relevant evidence.                                                        | 6    |
| Implications                         | 20   | Discuss the potential clinical use of the model and implications for future research.                                                                                                                 | 6    |
| <b>Other information<sup>1</sup></b> |      |                                                                                                                                                                                                       |      |
| Supplementary information            | 21   | Provide information about the availability of supplementary resources, such as study protocol, Web calculator, and data sets.                                                                         | 7    |
| Funding                              | 22   | Give the source of funding and the role of the funders for the present study.                                                                                                                         | 9    |

We recommend using the TRIPOD Checklist in conjunction with the TRIPOD Explanation and Elaboration document.
